# Supplementary material for: The evolutionary conserved proteins CEP90, FOPNL, and OFD1 recruit centriolar distal appendage proteins to initiate their assembly
Source: PubMed Central journal article supplement (PMC9484695; doi:10.1371/journal.pbio.3001782), 2022-09-07
Supplement: pbio.3001782.s002.pdf [file pbio.3001782.s002.pdf]

| Table S2                 | Primers, RNAi, siRNA and CEP90-GFP RNAi resistant sequences                                                                                                                                                                                                                                                                                                                                                                                                                                                                                                                                                                                                                                                                                                                                                                                                                                                                                                                                                                                                                                                                                                                                                                                                                                                                                                                                                                                                                                                                                                                                                                                                                                                                                                                                                                                                                                                                                                                                                                                                                                                                                                                                                                                                                                                                                                                                                                                                                                                                                                                                                                                                                                                                                                                                                                                                                                                                                                                                                                                                                                                                                                                                                                                                                                                                                                                                                                                                                                                                                                                                                                                                                                                                                                                                                                                                                                                                                                                                                                                                                                                                                                                                                                                                                                                                                                                                                                                                                                                                                                                                                                                                                                                                                                                                                                                                                                                                                                                                                                                                                                                                                                                                                    |                                                                                        |
|--------------------------|----------------------------------------------------------------------------------------------------------------------------------------------------------------------------------------------------------------------------------------------------------------------------------------------------------------------------------------------------------------------------------------------------------------------------------------------------------------------------------------------------------------------------------------------------------------------------------------------------------------------------------------------------------------------------------------------------------------------------------------------------------------------------------------------------------------------------------------------------------------------------------------------------------------------------------------------------------------------------------------------------------------------------------------------------------------------------------------------------------------------------------------------------------------------------------------------------------------------------------------------------------------------------------------------------------------------------------------------------------------------------------------------------------------------------------------------------------------------------------------------------------------------------------------------------------------------------------------------------------------------------------------------------------------------------------------------------------------------------------------------------------------------------------------------------------------------------------------------------------------------------------------------------------------------------------------------------------------------------------------------------------------------------------------------------------------------------------------------------------------------------------------------------------------------------------------------------------------------------------------------------------------------------------------------------------------------------------------------------------------------------------------------------------------------------------------------------------------------------------------------------------------------------------------------------------------------------------------------------------------------------------------------------------------------------------------------------------------------------------------------------------------------------------------------------------------------------------------------------------------------------------------------------------------------------------------------------------------------------------------------------------------------------------------------------------------------------------------------------------------------------------------------------------------------------------------------------------------------------------------------------------------------------------------------------------------------------------------------------------------------------------------------------------------------------------------------------------------------------------------------------------------------------------------------------------------------------------------------------------------------------------------------------------------------------------------------------------------------------------------------------------------------------------------------------------------------------------------------------------------------------------------------------------------------------------------------------------------------------------------------------------------------------------------------------------------------------------------------------------------------------------------------------------------------------------------------------------------------------------------------------------------------------------------------------------------------------------------------------------------------------------------------------------------------------------------------------------------------------------------------------------------------------------------------------------------------------------------------------------------------------------------------------------------------------------------------------------------------------------------------------------------------------------------------------------------------------------------------------------------------------------------------------------------------------------------------------------------------------------------------------------------------------------------------------------------------------------------------------------------------------------------------------------------------------------------------------------------|----------------------------------------------------------------------------------------|
|                          | <b>Primer <i>Paramecium</i></b>                                                                                                                                                                                                                                                                                                                                                                                                                                                                                                                                                                                                                                                                                                                                                                                                                                                                                                                                                                                                                                                                                                                                                                                                                                                                                                                                                                                                                                                                                                                                                                                                                                                                                                                                                                                                                                                                                                                                                                                                                                                                                                                                                                                                                                                                                                                                                                                                                                                                                                                                                                                                                                                                                                                                                                                                                                                                                                                                                                                                                                                                                                                                                                                                                                                                                                                                                                                                                                                                                                                                                                                                                                                                                                                                                                                                                                                                                                                                                                                                                                                                                                                                                                                                                                                                                                                                                                                                                                                                                                                                                                                                                                                                                                                                                                                                                                                                                                                                                                                                                                                                                                                                                                                |                                                                                        |
| <b>Constructs</b>        | <b>Primers</b>                                                                                                                                                                                                                                                                                                                                                                                                                                                                                                                                                                                                                                                                                                                                                                                                                                                                                                                                                                                                                                                                                                                                                                                                                                                                                                                                                                                                                                                                                                                                                                                                                                                                                                                                                                                                                                                                                                                                                                                                                                                                                                                                                                                                                                                                                                                                                                                                                                                                                                                                                                                                                                                                                                                                                                                                                                                                                                                                                                                                                                                                                                                                                                                                                                                                                                                                                                                                                                                                                                                                                                                                                                                                                                                                                                                                                                                                                                                                                                                                                                                                                                                                                                                                                                                                                                                                                                                                                                                                                                                                                                                                                                                                                                                                                                                                                                                                                                                                                                                                                                                                                                                                                                                                 |                                                                                        |
| CEP90a-GFP               | CEP90a sens                                                                                                                                                                                                                                                                                                                                                                                                                                                                                                                                                                                                                                                                                                                                                                                                                                                                                                                                                                                                                                                                                                                                                                                                                                                                                                                                                                                                                                                                                                                                                                                                                                                                                                                                                                                                                                                                                                                                                                                                                                                                                                                                                                                                                                                                                                                                                                                                                                                                                                                                                                                                                                                                                                                                                                                                                                                                                                                                                                                                                                                                                                                                                                                                                                                                                                                                                                                                                                                                                                                                                                                                                                                                                                                                                                                                                                                                                                                                                                                                                                                                                                                                                                                                                                                                                                                                                                                                                                                                                                                                                                                                                                                                                                                                                                                                                                                                                                                                                                                                                                                                                                                                                                                                    | caaatcatttaataataaactactagTATGAGTACGAAGAGAAAAGACATCATAAAAC                             |
|                          | CEP90a anti-sens                                                                                                                                                                                                                                                                                                                                                                                                                                                                                                                                                                                                                                                                                                                                                                                                                                                                                                                                                                                                                                                                                                                                                                                                                                                                                                                                                                                                                                                                                                                                                                                                                                                                                                                                                                                                                                                                                                                                                                                                                                                                                                                                                                                                                                                                                                                                                                                                                                                                                                                                                                                                                                                                                                                                                                                                                                                                                                                                                                                                                                                                                                                                                                                                                                                                                                                                                                                                                                                                                                                                                                                                                                                                                                                                                                                                                                                                                                                                                                                                                                                                                                                                                                                                                                                                                                                                                                                                                                                                                                                                                                                                                                                                                                                                                                                                                                                                                                                                                                                                                                                                                                                                                                                               | CTTCTCCTTTAGACATgggtacctcgagTCCTCCTCTTTATCTGTTTTTGTTC                                  |
| EP90a-GFP RNAi resistant | CEP90a-GFP RNAi resistant sens A                                                                                                                                                                                                                                                                                                                                                                                                                                                                                                                                                                                                                                                                                                                                                                                                                                                                                                                                                                                                                                                                                                                                                                                                                                                                                                                                                                                                                                                                                                                                                                                                                                                                                                                                                                                                                                                                                                                                                                                                                                                                                                                                                                                                                                                                                                                                                                                                                                                                                                                                                                                                                                                                                                                                                                                                                                                                                                                                                                                                                                                                                                                                                                                                                                                                                                                                                                                                                                                                                                                                                                                                                                                                                                                                                                                                                                                                                                                                                                                                                                                                                                                                                                                                                                                                                                                                                                                                                                                                                                                                                                                                                                                                                                                                                                                                                                                                                                                                                                                                                                                                                                                                                                               | GGATAGAGTATAGAATATCTATGAAGATACATTGGCTAATTGAAAAGCCACAAAACATGAAAACG                      |
|                          | CEP90a-GFP RNAi resistant antisens A                                                                                                                                                                                                                                                                                                                                                                                                                                                                                                                                                                                                                                                                                                                                                                                                                                                                                                                                                                                                                                                                                                                                                                                                                                                                                                                                                                                                                                                                                                                                                                                                                                                                                                                                                                                                                                                                                                                                                                                                                                                                                                                                                                                                                                                                                                                                                                                                                                                                                                                                                                                                                                                                                                                                                                                                                                                                                                                                                                                                                                                                                                                                                                                                                                                                                                                                                                                                                                                                                                                                                                                                                                                                                                                                                                                                                                                                                                                                                                                                                                                                                                                                                                                                                                                                                                                                                                                                                                                                                                                                                                                                                                                                                                                                                                                                                                                                                                                                                                                                                                                                                                                                                                           | CGTTTTTCATGTTTTGTGGCTTCAAAATTAGCCAATGTATCTTCATAGATATTCTATACCTATCC                      |
|                          | CEP90a-GFP RNAi resistant sens B                                                                                                                                                                                                                                                                                                                                                                                                                                                                                                                                                                                                                                                                                                                                                                                                                                                                                                                                                                                                                                                                                                                                                                                                                                                                                                                                                                                                                                                                                                                                                                                                                                                                                                                                                                                                                                                                                                                                                                                                                                                                                                                                                                                                                                                                                                                                                                                                                                                                                                                                                                                                                                                                                                                                                                                                                                                                                                                                                                                                                                                                                                                                                                                                                                                                                                                                                                                                                                                                                                                                                                                                                                                                                                                                                                                                                                                                                                                                                                                                                                                                                                                                                                                                                                                                                                                                                                                                                                                                                                                                                                                                                                                                                                                                                                                                                                                                                                                                                                                                                                                                                                                                                                               | GGATAAAACCCTAACCTCACTCTACCTCGTCCCATATTGAGGAAAAGGATAGAGAAAATTTTG                        |
|                          | CEP90a-GFP RNAi resistant antisens B                                                                                                                                                                                                                                                                                                                                                                                                                                                                                                                                                                                                                                                                                                                                                                                                                                                                                                                                                                                                                                                                                                                                                                                                                                                                                                                                                                                                                                                                                                                                                                                                                                                                                                                                                                                                                                                                                                                                                                                                                                                                                                                                                                                                                                                                                                                                                                                                                                                                                                                                                                                                                                                                                                                                                                                                                                                                                                                                                                                                                                                                                                                                                                                                                                                                                                                                                                                                                                                                                                                                                                                                                                                                                                                                                                                                                                                                                                                                                                                                                                                                                                                                                                                                                                                                                                                                                                                                                                                                                                                                                                                                                                                                                                                                                                                                                                                                                                                                                                                                                                                                                                                                                                           | CAAAAATTTCTATCCTTTTCTCAATATGGGCGACGAGGTAGGAGTGGGTTAGTGGGTTTTATCC                       |
| RNAi CEP90               | CEP90a sens                                                                                                                                                                                                                                                                                                                                                                                                                                                                                                                                                                                                                                                                                                                                                                                                                                                                                                                                                                                                                                                                                                                                                                                                                                                                                                                                                                                                                                                                                                                                                                                                                                                                                                                                                                                                                                                                                                                                                                                                                                                                                                                                                                                                                                                                                                                                                                                                                                                                                                                                                                                                                                                                                                                                                                                                                                                                                                                                                                                                                                                                                                                                                                                                                                                                                                                                                                                                                                                                                                                                                                                                                                                                                                                                                                                                                                                                                                                                                                                                                                                                                                                                                                                                                                                                                                                                                                                                                                                                                                                                                                                                                                                                                                                                                                                                                                                                                                                                                                                                                                                                                                                                                                                                    | CCATTTAAAAAGGAAGGGGAATTTAGAAAATTTGGCCAATCTTAAAGCTACAAAGCATG                            |
|                          | CEP90a antisens                                                                                                                                                                                                                                                                                                                                                                                                                                                                                                                                                                                                                                                                                                                                                                                                                                                                                                                                                                                                                                                                                                                                                                                                                                                                                                                                                                                                                                                                                                                                                                                                                                                                                                                                                                                                                                                                                                                                                                                                                                                                                                                                                                                                                                                                                                                                                                                                                                                                                                                                                                                                                                                                                                                                                                                                                                                                                                                                                                                                                                                                                                                                                                                                                                                                                                                                                                                                                                                                                                                                                                                                                                                                                                                                                                                                                                                                                                                                                                                                                                                                                                                                                                                                                                                                                                                                                                                                                                                                                                                                                                                                                                                                                                                                                                                                                                                                                                                                                                                                                                                                                                                                                                                                | CACCGCGGTGGCGGCCCTCTAGAAGTACGAGATAGGAATGActaanaataaag                                  |
|                          | CEP90b sens                                                                                                                                                                                                                                                                                                                                                                                                                                                                                                                                                                                                                                                                                                                                                                                                                                                                                                                                                                                                                                                                                                                                                                                                                                                                                                                                                                                                                                                                                                                                                                                                                                                                                                                                                                                                                                                                                                                                                                                                                                                                                                                                                                                                                                                                                                                                                                                                                                                                                                                                                                                                                                                                                                                                                                                                                                                                                                                                                                                                                                                                                                                                                                                                                                                                                                                                                                                                                                                                                                                                                                                                                                                                                                                                                                                                                                                                                                                                                                                                                                                                                                                                                                                                                                                                                                                                                                                                                                                                                                                                                                                                                                                                                                                                                                                                                                                                                                                                                                                                                                                                                                                                                                                                    | CCATTTAAAAAGGAAGGGGAATTTAGAAAATTTGGCCAATCTTAAAGCTACAAAGCATG                            |
|                          | CEP90b antisens                                                                                                                                                                                                                                                                                                                                                                                                                                                                                                                                                                                                                                                                                                                                                                                                                                                                                                                                                                                                                                                                                                                                                                                                                                                                                                                                                                                                                                                                                                                                                                                                                                                                                                                                                                                                                                                                                                                                                                                                                                                                                                                                                                                                                                                                                                                                                                                                                                                                                                                                                                                                                                                                                                                                                                                                                                                                                                                                                                                                                                                                                                                                                                                                                                                                                                                                                                                                                                                                                                                                                                                                                                                                                                                                                                                                                                                                                                                                                                                                                                                                                                                                                                                                                                                                                                                                                                                                                                                                                                                                                                                                                                                                                                                                                                                                                                                                                                                                                                                                                                                                                                                                                                                                | CATGCTTTGTAGCTTAAAGATTGGCCAAGTTCTAAAATCCCCTCTCTTTTAAATGG                               |
|                          | <b>RNAi <i>Paramecium</i></b>                                                                                                                                                                                                                                                                                                                                                                                                                                                                                                                                                                                                                                                                                                                                                                                                                                                                                                                                                                                                                                                                                                                                                                                                                                                                                                                                                                                                                                                                                                                                                                                                                                                                                                                                                                                                                                                                                                                                                                                                                                                                                                                                                                                                                                                                                                                                                                                                                                                                                                                                                                                                                                                                                                                                                                                                                                                                                                                                                                                                                                                                                                                                                                                                                                                                                                                                                                                                                                                                                                                                                                                                                                                                                                                                                                                                                                                                                                                                                                                                                                                                                                                                                                                                                                                                                                                                                                                                                                                                                                                                                                                                                                                                                                                                                                                                                                                                                                                                                                                                                                                                                                                                                                                  |                                                                                        |
| RNAi CEP90a              | CTTTGGCCAATCTTAAAGCTACAAAGCATGAAAATGAAATGTAAAGGAGAAGATCAACGTGTTGAAGGCAGAGTATTATAAGTGTAGGTAGAGGCTAAGGAATAGATGAGCAGCATAAATGCTTAATGTCAAGTTGCAAAAAGAACAATTAACATAATATGAAGGAATGAAAAAGAAATGATGATGC<br>CATAATGAAATCAGCAGGCAATGAATATGATGCAATGAATCCTTTATTGGGATTCATGGGCACTGTACCTACATCTTCAAAAAGAAGATTCAACAGGCATTAATCTCGCTTAGAGATTGCAAGCAAAAATAAAGAGAATCAGAGGAATTGCAAAAGACAATTAAGAGATAAGTCATAAGAGATTGAGAGA<br>CTATAGGAAGAGACCAAAATATAAAGAGATGACTTGACAAAACACATTAACGtaaatattcattanaatcttttttagTCATTCCCTATCTCGTA                                                                                                                                                                                                                                                                                                                                                                                                                                                                                                                                                                                                                                                                                                                                                                                                                                                                                                                                                                                                                                                                                                                                                                                                                                                                                                                                                                                                                                                                                                                                                                                                                                                                                                                                                                                                                                                                                                                                                                                                                                                                                                                                                                                                                                                                                                                                                                                                                                                                                                                                                                                                                                                                                                                                                                                                                                                                                                                                                                                                                                                                                                                                                                                                                                                                                                                                                                                                                                                                                                                                                                                                                                                                                                                                                                                                                                                                                                                                                                                                                                                                                                                                                                                                                                                                                                                                                                                                                                                                                                                                                                                                                                                                                                               |                                                                                        |
| RNAi CEP90b              | GATTCGTATCCATAGCTGATATTGAGAATTTTAAATGAGAAGAGACATAATAGAGGAGGGGACTCACGACACAGTCAATATGAAAAATgtattataattgattcaataaagAAATTTCTTCTGTAGTGGGCATGCAAGAGAAAATAAATAGCATTTCTAAATGCAGAAAATAAAGCGGATTCAGCAGCTAACGATGCT<br>GATAGACAAAGGATTTTGTCTAATCATAGAATTGAACTGATAAGCTTTTAAAGTGAATCAAAACACATTAAGTCAAGATGATATATAAAGAACTCAATGGCAGGAATAAGGAGGCTTTGGCATAAGTCAGAGACATGTTAGCTGGGTTAGTCCAGAGGTTGTTTTATTGAGATTGAGAGATATGAA<br>TGAGAAGGAGATGCCATCTAAGATTGGTGTGGTTTAGGTTTGGGAGATTGTGTATCCATTTAAAAAGGAAGGGGAATTTAGAAA                                                                                                                                                                                                                                                                                                                                                                                                                                                                                                                                                                                                                                                                                                                                                                                                                                                                                                                                                                                                                                                                                                                                                                                                                                                                                                                                                                                                                                                                                                                                                                                                                                                                                                                                                                                                                                                                                                                                                                                                                                                                                                                                                                                                                                                                                                                                                                                                                                                                                                                                                                                                                                                                                                                                                                                                                                                                                                                                                                                                                                                                                                                                                                                                                                                                                                                                                                                                                                                                                                                                                                                                                                                                                                                                                                                                                                                                                                                                                                                                                                                                                                                                                                                                                                                                                                                                                                                                                                                                                                                                                                                                                                                                                                                   |                                                                                        |
|                          | <b>RNAi resistant CEP90-GFP</b>                                                                                                                                                                                                                                                                                                                                                                                                                                                                                                                                                                                                                                                                                                                                                                                                                                                                                                                                                                                                                                                                                                                                                                                                                                                                                                                                                                                                                                                                                                                                                                                                                                                                                                                                                                                                                                                                                                                                                                                                                                                                                                                                                                                                                                                                                                                                                                                                                                                                                                                                                                                                                                                                                                                                                                                                                                                                                                                                                                                                                                                                                                                                                                                                                                                                                                                                                                                                                                                                                                                                                                                                                                                                                                                                                                                                                                                                                                                                                                                                                                                                                                                                                                                                                                                                                                                                                                                                                                                                                                                                                                                                                                                                                                                                                                                                                                                                                                                                                                                                                                                                                                                                                                                |                                                                                        |
| EP90a-GFP RNAi resistant | ATGAGTACGAAGAGAAAAGACATCAAAAACCTTATGAAATCGATGAATATAGATCCAACCACATTTTCTGAGGAAGATATAAGATAATTTGAATAAAGGCTAAGTGATGATGAGTACAGTGAATCAGATAGTATGAGGGATTCCGTTATCCATAGCTGATATTGAGAATTCAATAGACTAAACATAACA<br>GAGGGGGAAACACTCATGATACAGTCAATATGAAAAATGATTTATTGTAATCGATCCATTTTAGAAATTTATCCTCGGTTGGGCTGCAGGAAAAATAAATAGCTTTTCTAAATGCTGAGATCAAAAGGATCCAAGCAGCAATGACGCTGATAGACAAAAGATTTTTGCTAATCATCGAATTTGAAACA<br>GATAAACCTTTAAGTGAAATCAAATAACTAAAGTCTAAGATGATCTATCAAGAGTCTCAATACCAGGCATAAGAGAAGCTTTGGCTAAGTTAGAGATATGCTTGGTGGATGGTCCAGAGGCTGTTTATCTGAGGTGGGAGATGAATGAGAAGGAAATGCCCATCAAGATTGGGTTA<br>GGTTTTGGGAAATTGGTATCCATTTCAAAAAGGAGGGGGAGTTTTAGAAAAAGGAATATTGGCTTTAAGGGAAGAAGCTCAGATAGATAACAGAGAAGCATAAATTCTTATTGAATGATTTGGAACATGGCTAAAAGATGATGGTAGACAGAGAAGGAGGATTTGAAGACATAAATTAATTTAGTAAAT<br>GCTAGAAAAGGCTTTGGAGTTAGAATTAAACAAATCTTAAAGGAATTAGCCCTGTTGAGAGAGAAGGGAGCAAGATTGATGAATTAAGTAGGATTAAAGAGATTGGAGTAAAGAGAAGTTTTTTATTGGAAGAGAAGGCTGGTTTCTATCAAAAATAAAGCCGGAGACAAGGCAGGTGATTAATAC<br>AAGGCATAGGATGACCCAAAGGAAGGGAGACCTTTGCAATTAAGACAAGGAATTTGACTAAGGAGAATTTAACTTTTGGAGAAGGTTAAGAGATTGGAGGACAAAATAGATAGGACAGAGAAGGAGTATTGGAAGCAAAAACCTAAGCTTAAGAATATCTATTTAATTTCAATTTCAAAA<br>CAGATTAGACTCAGGCTTATGAAAAAGAAATTTACTCAGAAATTCAGATCTTAAAGAGAGAAGCCTCATGATACAGTCAATATGAAAAATGATTTATTGTAATCGATCCATTTTAGAAATTTATCCTCGTGGTGCAGGAAAAATAAATAGCTTTTAAATGCTGAGATCAAAAGGATCCAAGCAGCAATG<br>AAAATCAAATTTATGATCATTGCTAATGATGATAAGAACTTAAAGAAAAATAGATGGGGACTTATCTGAATAGAGAATTCATTAAGATTGAAGGTGGAAGAGTTGGATAGAGTATAGAATATCTATGAAGATACTATGGGCTAATTTGAAAGCCACAAAACATGAAAACCGAGATTTGAGGG<br>AAAAATCAATGTCTTAAAAGCCGAATATTAAAATGCTAAGTTCGAGGCCAAGGAATAAATGTCAGACTCAAGCTTAACTTTAAGTCCGCAAGAAATAATTTGACTAATGAGGAAATCGAAAAGGAAATCGATGATGCTATTATGAAAGTCAAGCCGAAATACGATGCTATTATGAAAGTCAAGG<br>ACCCTTTATTGGGATTCATGGGAACAGTCCCAACATCATCTAAAAGGAGAATTCATAAGCATTGAACCTCGCCTAAAGACTTTAAGCAAAAGCAAAAGAGAAGGCAAGGAGCTTTAAGACAATTGAGAGACAAAATCACAAGAAATCGAGAGCTTTAAGAGGAAAACAAAATTCAAAAGA<br>GATGCTTTGGATAAAACCCACTAACCTCACTCTACCTCGCTGCTATGAGTACGAAGAGAAAAGACATCAAAAACCTTATGAAATCGATGAATATAGATCCAACCACATTTTCTGAGGAAGATATAAGATAATTTGAATAAAGGCTAAGTGATGATGAGTACAGTGAATCAGATAGTATGAGGGATTCGGT<br>ATCCATAGCTGATATTGAGAATTATCAATAGACTAAACATAACAGAGGGGGGAACACTCATGATACAGTCAATATGAAAAATGATTTATTGTAATCGATCCATTTTAGAAATTTATCCTCGTGGTGCAGGAAAAATAAATAGCTTTTAAATGCTGAGATCAAAAGGATCCAAGCAGCAATG<br>ACGCTGATAGACAAGAGATTTTGTCTAATCATCGAATTTGAAACAGATAAACTTTTAAAGTGAATCAAATAACTAAAGTCAAGATGATCTATCAAGAGTCTCAATACCAGGCATAAGAGAAGCTTTGGCTAAGTTAGAGATATGCTTGGTGGATGGTCCAGAGGCTGTTTATCTGAGGTGGCAGAT<br>ATGAATGAGAAGGAAATGCCATTTCAAGATTGGGTTAGGTTTGGGTTTGGGAAATTTGGTATCCATTTCAAAAAGGAGGGGGAGTTTTAGAAAAAGGAATATTGGCTTTAAGGGAAGAAGCTCAGATAGATAACAGAGAAGCATAAATTCTTATTGAATGATTTGGAACATGGCTAAAAGATGATGGTAG<br>ACAGAGAAGAGGATATTAGAAGACATAAATTAATATGATAATGCTAGAAAAGGCTTTGGAGTTAGAATTAAACAAATCTTAAAGGAATTAGCCCTGTTGAGAGAGAAGGGAGCAAGATTGATGAATTAAGTAGGATTAAAGAGATTGGAGTAAAGAGAAGTTTTTTATTGGAAGAGAAGGCTGGTT<br>TCTATCAAAAATAAATTAAGCCGGAGACAAGGCAGGTGATTAATACAAGGCATAGGATGACCCAAAGGAAGGGAGACCTTTGCAATTAAGACAAGGAATTTGACTAAGGAGAATATTAACTTTTGGAGAAGGTTAAGAGATTGGAGGACAAAATAGATAGGACAGAGAAGGAGTATTGGAAGCAA<br>AAAACCTAAGCTTAAAGAAATATCTATTTTAATTACTCAATTTAAAACAGATTAGACTCAGGCTTATGAAAAAGAAATTTACTCAGAAATGCGAGATCTTAAAGAGAAGCCTCATGAAATTGGAATTTAGATTGATTTATGAGACTCAAATCAAAATCTTGAAGGATGCAAAAGGAG<br>GAAATTTAACTTCGAAAAGATAATCTAAGAGGGCAAGTGAAGGAAAAATCACTTTATATGATCATTTGTCTAATGATTTATAGAACTTAAAGAAAAATAGATGGGACTTATCTGAATAGAGAATTCATTAAGATTGAAGGTGGAAGAGTTGGATAGAGTATAGAATATCTATGAAGATACATTGG<br>CTAATTTGAAAGCCACAAAACATGAAAACGAGATGTTGAGGGAAAAAATCAATGTCTTAAAAGCCGAATATTAAAATGCTAAGTTCGAGGCCAAGGAATAAATGTCAGACTCAAGCTTAACTTTAAGTCCGCAAGAAATAATTTGACTAATGAGGAAATCGAAAAGGAAATCGATGATGCTATTAT<br>GAAGTCAGCCGAAACGAATACGATGCTATGAACCTTTATTGGGATTCATGGGAACAGTCCCAACATCTATAAAGGAGAATTCATAAAGCAATTGAACCTCGCCTAAAGACTTTAAGCAAAGCAAGAGAAGGCAAGGAGCTTTAAGACAATTGAGAGACAAATCACAAGAAATCGAGAGACTTTAA<br>GAGGAACCAAAATACAAAGAGATGCTTTGGATAAAACCCACTAACCTCACTCTACCTCGTCCGCTAATTTAGGAAAAAGGATAGAGAAAATTTGAAATATAAATCCCCTTTTAAAGAAAAATGGATTAGGATTTATAGATCCTAAAAGCAGAAAACGATGATGAGCAATGTAATTTATTAGTATAAAAT<br>TTAATAGAGATTCTATGCGAGCTGAAGAGGATCTATAGAGATTGAGAATTTAAAAGACAGAACCTACAAAACATTTAGAACATTTTGGATTGGATTGCCACTGGTATTAGAATGATATGAGATAAAATCTGAGAAGTCCATAAATGAGATGTCGGAAGCCTAAAATCAAAAGACATATATTGATCCTCAAA<br>GTGCGATCAAAAAGGGATGAAATTTGCATTAATTTGCAAGGTGGAATTTCAAGTAGTTAATAAAAAAGGAAGATGTTCCCTTTGGTATTCAAAAATGAAACAAAACAGAATAAAGGAGGAGGACTCGAGGTACGATGCTAAAGGAGAAGAAATTTACTACTGGTGTGTTCCAAATTTCTGTTGA<br>ACTTGATGGTATGTTAATGGACATAAAATTTCTGTTCTGGTGGGGTGAAGGTGATGCAACATATGAAAAATTAACCTTAAAATTTATTGCACTACTGGAAAATTAACCTGTTCCATGGCCAACACTTGTCACTCTTTAACTTATGGAGTTCAATGTTTTTCAAGATACCCTGATCATATGAAACAACAT<br>GACTTTTCAAACTGCTCCATGCCAGAAGGATATGTCGAAGAAAAGAACTATATCTTCAAAAGATGATGGAACTACAAAGACAAGAGCTGAAGTCAAATTTGAAGGAGATACCTTGTCAATAGAATTTGAGTTAAAAGGAAATGATTTTAAAGAAAGATGGAACATTTTAGGACATAAATTTGGAATACAACATA<br>TAACCTACATAATGATACATCATGCGAGACAACAAAAAATGGAATCAAATCAACTCAACTTAAAGATAGACACAACATTAAGATGGATGATCAGTTCAATAGCAGACATTATCAACAAAATACTCCAATTTGAGATGGCCCTGTTTTATTACCAGACAACCTACTTATCAACACAATCTGCCCTATCAAA<br>AGATCAAATGAAAAGAGAGCCATATGGTTTTATTAGAGTTTGTAACTGCTGGAATACACATGGCATTGATG |                                                                                        |
|                          | <b>siRNA mammalian cells</b>                                                                                                                                                                                                                                                                                                                                                                                                                                                                                                                                                                                                                                                                                                                                                                                                                                                                                                                                                                                                                                                                                                                                                                                                                                                                                                                                                                                                                                                                                                                                                                                                                                                                                                                                                                                                                                                                                                                                                                                                                                                                                                                                                                                                                                                                                                                                                                                                                                                                                                                                                                                                                                                                                                                                                                                                                                                                                                                                                                                                                                                                                                                                                                                                                                                                                                                                                                                                                                                                                                                                                                                                                                                                                                                                                                                                                                                                                                                                                                                                                                                                                                                                                                                                                                                                                                                                                                                                                                                                                                                                                                                                                                                                                                                                                                                                                                                                                                                                                                                                                                                                                                                                                                                   |                                                                                        |
| siRNA CEP90 #1           | siGENOME SMARTpool siRNA D-020125-01, PIBF1 Dharmacon                                                                                                                                                                                                                                                                                                                                                                                                                                                                                                                                                                                                                                                                                                                                                                                                                                                                                                                                                                                                                                                                                                                                                                                                                                                                                                                                                                                                                                                                                                                                                                                                                                                                                                                                                                                                                                                                                                                                                                                                                                                                                                                                                                                                                                                                                                                                                                                                                                                                                                                                                                                                                                                                                                                                                                                                                                                                                                                                                                                                                                                                                                                                                                                                                                                                                                                                                                                                                                                                                                                                                                                                                                                                                                                                                                                                                                                                                                                                                                                                                                                                                                                                                                                                                                                                                                                                                                                                                                                                                                                                                                                                                                                                                                                                                                                                                                                                                                                                                                                                                                                                                                                                                          | GAGAUUAGACAACCAUUG                                                                     |
|                          | siGENOME SMARTpool siRNA D-020125-02, PIBF1 Dharmacon                                                                                                                                                                                                                                                                                                                                                                                                                                                                                                                                                                                                                                                                                                                                                                                                                                                                                                                                                                                                                                                                                                                                                                                                                                                                                                                                                                                                                                                                                                                                                                                                                                                                                                                                                                                                                                                                                                                                                                                                                                                                                                                                                                                                                                                                                                                                                                                                                                                                                                                                                                                                                                                                                                                                                                                                                                                                                                                                                                                                                                                                                                                                                                                                                                                                                                                                                                                                                                                                                                                                                                                                                                                                                                                                                                                                                                                                                                                                                                                                                                                                                                                                                                                                                                                                                                                                                                                                                                                                                                                                                                                                                                                                                                                                                                                                                                                                                                                                                                                                                                                                                                                                                          | ACAGGUUAUCUAUUGAAUC                                                                    |
|                          | siGENOME SMARTpool siRNA D-020125-03, PIBF1 Dharmacon                                                                                                                                                                                                                                                                                                                                                                                                                                                                                                                                                                                                                                                                                                                                                                                                                                                                                                                                                                                                                                                                                                                                                                                                                                                                                                                                                                                                                                                                                                                                                                                                                                                                                                                                                                                                                                                                                                                                                                                                                                                                                                                                                                                                                                                                                                                                                                                                                                                                                                                                                                                                                                                                                                                                                                                                                                                                                                                                                                                                                                                                                                                                                                                                                                                                                                                                                                                                                                                                                                                                                                                                                                                                                                                                                                                                                                                                                                                                                                                                                                                                                                                                                                                                                                                                                                                                                                                                                                                                                                                                                                                                                                                                                                                                                                                                                                                                                                                                                                                                                                                                                                                                                          | UCGUUUAAGAUGCAUAGUAA                                                                   |
|                          | siGENOME SMARTpool siRNA D-020125-04, PIBF1 Dharmacon                                                                                                                                                                                                                                                                                                                                                                                                                                                                                                                                                                                                                                                                                                                                                                                                                                                                                                                                                                                                                                                                                                                                                                                                                                                                                                                                                                                                                                                                                                                                                                                                                                                                                                                                                                                                                                                                                                                                                                                                                                                                                                                                                                                                                                                                                                                                                                                                                                                                                                                                                                                                                                                                                                                                                                                                                                                                                                                                                                                                                                                                                                                                                                                                                                                                                                                                                                                                                                                                                                                                                                                                                                                                                                                                                                                                                                                                                                                                                                                                                                                                                                                                                                                                                                                                                                                                                                                                                                                                                                                                                                                                                                                                                                                                                                                                                                                                                                                                                                                                                                                                                                                                                          | GAUCAGUCUUAGACAGGU                                                                     |
| siRNA CEP90 #2           | based on siRNA CEP90#1 (Kodami <i>et al.</i> 2015) Dharmacon                                                                                                                                                                                                                                                                                                                                                                                                                                                                                                                                                                                                                                                                                                                                                                                                                                                                                                                                                                                                                                                                                                                                                                                                                                                                                                                                                                                                                                                                                                                                                                                                                                                                                                                                                                                                                                                                                                                                                                                                                                                                                                                                                                                                                                                                                                                                                                                                                                                                                                                                                                                                                                                                                                                                                                                                                                                                                                                                                                                                                                                                                                                                                                                                                                                                                                                                                                                                                                                                                                                                                                                                                                                                                                                                                                                                                                                                                                                                                                                                                                                                                                                                                                                                                                                                                                                                                                                                                                                                                                                                                                                                                                                                                                                                                                                                                                                                                                                                                                                                                                                                                                                                                   | TCTGCAAGAGGAAACAGCAAGAAAT                                                              |
| siRNA FOPNL #1           | based on siRNA FOR20#2 (Sedjai <i>et al.</i> 2010) Dharmacon                                                                                                                                                                                                                                                                                                                                                                                                                                                                                                                                                                                                                                                                                                                                                                                                                                                                                                                                                                                                                                                                                                                                                                                                                                                                                                                                                                                                                                                                                                                                                                                                                                                                                                                                                                                                                                                                                                                                                                                                                                                                                                                                                                                                                                                                                                                                                                                                                                                                                                                                                                                                                                                                                                                                                                                                                                                                                                                                                                                                                                                                                                                                                                                                                                                                                                                                                                                                                                                                                                                                                                                                                                                                                                                                                                                                                                                                                                                                                                                                                                                                                                                                                                                                                                                                                                                                                                                                                                                                                                                                                                                                                                                                                                                                                                                                                                                                                                                                                                                                                                                                                                                                                   | GTATTATAAAGGCCCTTAA                                                                    |
| siRNA FOR20 #2           | siGENOME SMARTpool siRNA D-016243-01, FOPNL Dharmacon                                                                                                                                                                                                                                                                                                                                                                                                                                                                                                                                                                                                                                                                                                                                                                                                                                                                                                                                                                                                                                                                                                                                                                                                                                                                                                                                                                                                                                                                                                                                                                                                                                                                                                                                                                                                                                                                                                                                                                                                                                                                                                                                                                                                                                                                                                                                                                                                                                                                                                                                                                                                                                                                                                                                                                                                                                                                                                                                                                                                                                                                                                                                                                                                                                                                                                                                                                                                                                                                                                                                                                                                                                                                                                                                                                                                                                                                                                                                                                                                                                                                                                                                                                                                                                                                                                                                                                                                                                                                                                                                                                                                                                                                                                                                                                                                                                                                                                                                                                                                                                                                                                                                                          | GUACUUAACAUUGAAGACUCU                                                                  |
|                          | siGENOME SMARTpool siRNA D-016243-02, FOPNL Dharmacon                                                                                                                                                                                                                                                                                                                                                                                                                                                                                                                                                                                                                                                                                                                                                                                                                                                                                                                                                                                                                                                                                                                                                                                                                                                                                                                                                                                                                                                                                                                                                                                                                                                                                                                                                                                                                                                                                                                                                                                                                                                                                                                                                                                                                                                                                                                                                                                                                                                                                                                                                                                                                                                                                                                                                                                                                                                                                                                                                                                                                                                                                                                                                                                                                                                                                                                                                                                                                                                                                                                                                                                                                                                                                                                                                                                                                                                                                                                                                                                                                                                                                                                                                                                                                                                                                                                                                                                                                                                                                                                                                                                                                                                                                                                                                                                                                                                                                                                                                                                                                                                                                                                                                          | GCCAAUGGAUGACCACCUA                                                                    |
|                          | siGENOME SMARTpool siRNA D-016243-03, FOPNL Dharmacon                                                                                                                                                                                                                                                                                                                                                                                                                                                                                                                                                                                                                                                                                                                                                                                                                                                                                                                                                                                                                                                                                                                                                                                                                                                                                                                                                                                                                                                                                                                                                                                                                                                                                                                                                                                                                                                                                                                                                                                                                                                                                                                                                                                                                                                                                                                                                                                                                                                                                                                                                                                                                                                                                                                                                                                                                                                                                                                                                                                                                                                                                                                                                                                                                                                                                                                                                                                                                                                                                                                                                                                                                                                                                                                                                                                                                                                                                                                                                                                                                                                                                                                                                                                                                                                                                                                                                                                                                                                                                                                                                                                                                                                                                                                                                                                                                                                                                                                                                                                                                                                                                                                                                          | GAUCCGAGCUGAAGUUUUC                                                                    |
|                          | siGENOME SMARTpool siRNA D-016243-04, FOPNL Dharmacon                                                                                                                                                                                                                                                                                                                                                                                                                                                                                                                                                                                                                                                                                                                                                                                                                                                                                                                                                                                                                                                                                                                                                                                                                                                                                                                                                                                                                                                                                                                                                                                                                                                                                                                                                                                                                                                                                                                                                                                                                                                                                                                                                                                                                                                                                                                                                                                                                                                                                                                                                                                                                                                                                                                                                                                                                                                                                                                                                                                                                                                                                                                                                                                                                                                                                                                                                                                                                                                                                                                                                                                                                                                                                                                                                                                                                                                                                                                                                                                                                                                                                                                                                                                                                                                                                                                                                                                                                                                                                                                                                                                                                                                                                                                                                                                                                                                                                                                                                                                                                                                                                                                                                          | GCCAUUUCUUGCGUGGAA                                                                     |
| scrambled control        | siGENOME Non-Targeting siRNA Pool #2 Dharmacon                                                                                                                                                                                                                                                                                                                                                                                                                                                                                                                                                                                                                                                                                                                                                                                                                                                                                                                                                                                                                                                                                                                                                                                                                                                                                                                                                                                                                                                                                                                                                                                                                                                                                                                                                                                                                                                                                                                                                                                                                                                                                                                                                                                                                                                                                                                                                                                                                                                                                                                                                                                                                                                                                                                                                                                                                                                                                                                                                                                                                                                                                                                                                                                                                                                                                                                                                                                                                                                                                                                                                                                                                                                                                                                                                                                                                                                                                                                                                                                                                                                                                                                                                                                                                                                                                                                                                                                                                                                                                                                                                                                                                                                                                                                                                                                                                                                                                                                                                                                                                                                                                                                                                                 | UAAGGCUAUGAAGAGAUAC<br>AUGUAUUGGCCUGUAUUG<br>AUGAACGUGAAUUGCUAA<br>UGGUUUACAUGUCGACUAA |
